# Supplementary material for: Hypoglycemia and glycemic variability of people with type 1 diabetes with lower and higher physical activity loads in free-living conditions using continuous subcutaneous insulin infusion with predictive low-glucose suspend system
Source: HighWire-hosted journal article supplement (doi:10.1136/bmjdrc-2022-003082), 2023-03-01
Supplement: bmjdrc-2022-003082supp001_data_supplement.pdf [file bmjdrc-2022-003082supp001_data_supplement.pdf]

## Supplementary Figures

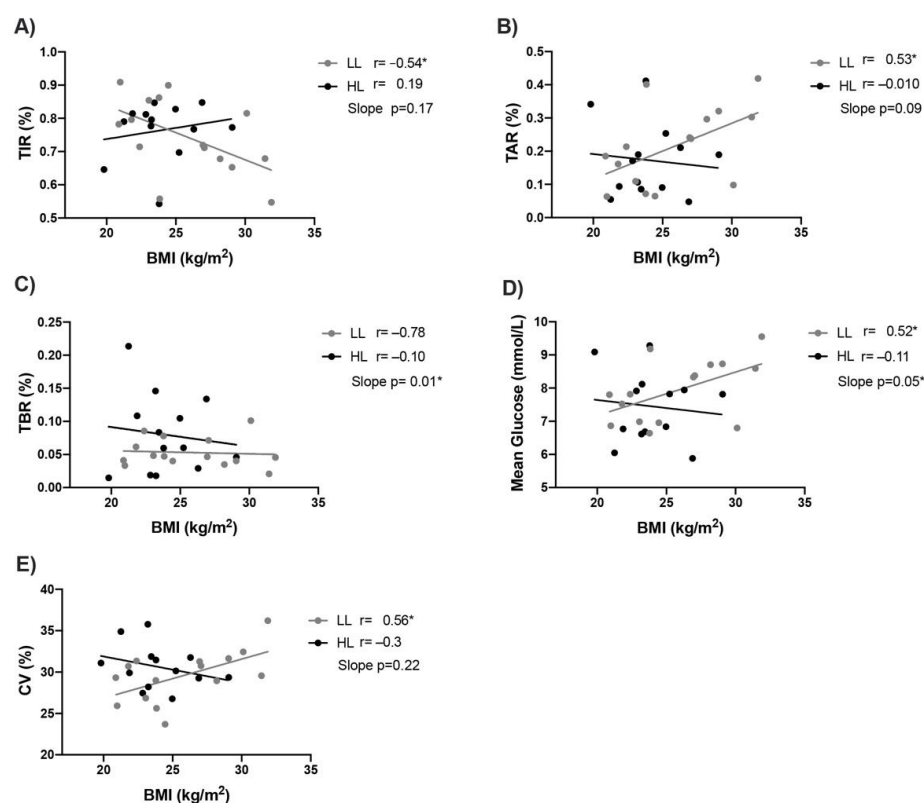

**Supplementary Figure 1. Glycemia parameters correlate with BMI in T1D physically active patients.** Lower Load (LL) and Higher Load (HL) group correlation analysis between BMI and % of time in glucose range A) TIR, B) TAR, C) TBR, D) Mean Glucose (mmol/L); E) Glycemic coefficient of variation (CV) (%). Pearson correlation;  $*p < 0.05$ .

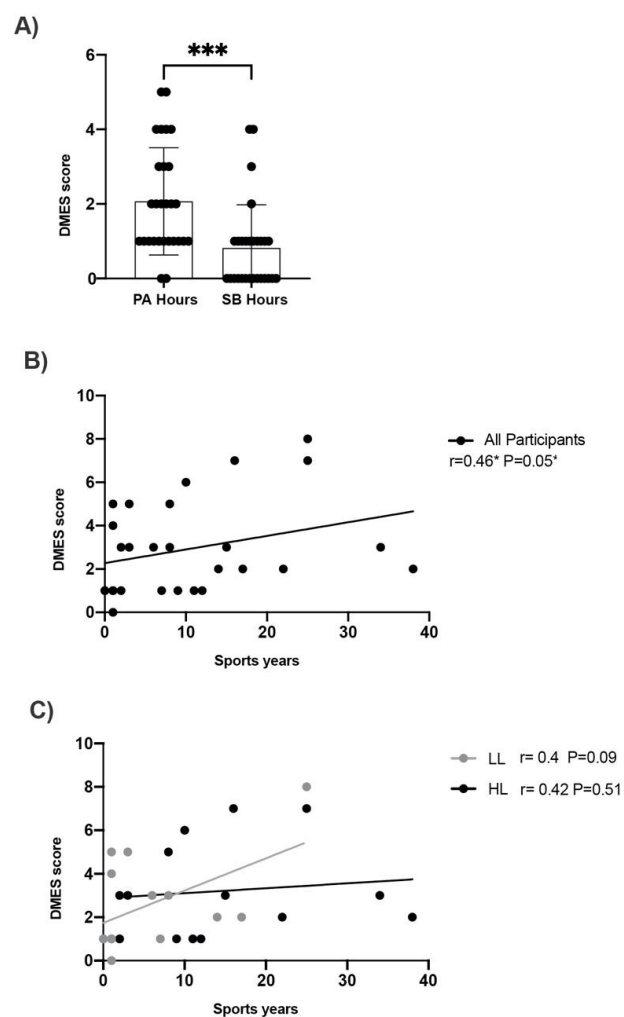

**Supplementary Figure 2. DMES evaluation according to active and sedentary hours and sport years.** A) Comparison of DMES strategies (DMES score) in all participants according active (PA) and sedentary behavior (SB) hours; B) Correlation analyses between sports years and DMES score in all participants and C) according load group, Lower Load (LL), Higher Load (HL). Wilcoxon matched pairs signed rank test \*\*\*P value  $\leq 0.001$ . Correlation of *Spearman*, \*P value  $\leq 0.05$ .

**Supplementary Table 1** : Diabetes management strategies for exercise

|                                                                                                                                                               |                                               |                                                                                                                                                                  |
|---------------------------------------------------------------------------------------------------------------------------------------------------------------|-----------------------------------------------|------------------------------------------------------------------------------------------------------------------------------------------------------------------|
| During PA Strategies: Actions taken for diabetes management in the immediate time of PA, ranging from 90 minutes prior to PA onset including hours during PA. | Snack previous to PA                          | Carbohydrates consumed anywhere from 90 minutes prior to PA onset.                                                                                               |
|                                                                                                                                                               | Bolus reduction for food previous to PA       | Reduced meal insulin bolus for carbohydrates consumed from 90 minutes prior to PA onset.                                                                         |
|                                                                                                                                                               | Basal insulin reduction previous to PA        | Pre-exercise basal adjustment from 90 minutes prior to PA onset. Strategies include 50%-80% reduction and or pump suspension for PLGS system.                    |
|                                                                                                                                                               | Snack during PA                               | Carbohydrates consumed during minutes of PA execution.                                                                                                           |
|                                                                                                                                                               | Basal insulin reduction during PA             | Basal adjustment from time of PA onset until PA completion. Strategies include 50%-80% reduction and or pump suspension for PLGS system and during PA execution. |
|                                                                                                                                                               |                                               |                                                                                                                                                                  |
| Post PA Strategies: Actions taken for diabetes management during the time right after executing PA and the following 24 hours.                                | Basal insulin reduction posterior to PA       | Post-exercise basal adjustment up to 540 minutes after PA execution. Strategies include 10%-20% basal reduction for PLGS system.                                 |
|                                                                                                                                                               | Correction bolus posterior to PA              | Insulin bolus without food to avoid hyperglycemia post-exercise.                                                                                                 |
|                                                                                                                                                               | Basal insulin reduction night posterior to PA | Nighttime post-exercise basal adjustment. Reduction up to 20% for PLGS system.                                                                                   |
|                                                                                                                                                               | Snack posterior to PA                         | Carbohydrates consumed anywhere up to 90 minutes from exercise completion.                                                                                       |
|                                                                                                                                                               | Bolus reduction for food posterior to PA      | 0-50% insulin bolus reduction post-exercise meal.                                                                                                                |

**Supplementary Table 2:** PA reported by patients and divided by less and more active groups

| Exercise Type       | Number of Subjects (n) | Total enrolled subjects (%) | LL Group (%) | HL Group (%) |
|---------------------|------------------------|-----------------------------|--------------|--------------|
| Biking              | 15                     | 54                          | 43           | 64           |
| Strenght Training   | 13                     | 46                          | 43           | 50           |
| Running             | 13                     | 46                          | 43           | 50           |
| Walking             | 13                     | 46                          | 21           | 71           |
| Other               | 9                      | 32                          | 29           | 36           |
| Cardio              | 5                      | 18                          | 7            | 29           |
| Elliptical Training | 3                      | 11                          | 7            | 14           |
| Pilates             | 2                      | 7                           | 0            | 14           |
| Swimming            | 2                      | 7                           | 7            | 7            |
| Trekking            | 2                      | 7                           | 0            | 14           |
| Yoga                | 1                      | 4                           | 0            | 7            |

*Physical activity events reported with Garmin Forerunner 745.*

**Supplementary Table 3:** Diabetes management strategies for exercise reported by group (n=14 per group)

| Diabetes management strategies                | LL Group | HL Group |
|-----------------------------------------------|----------|----------|
| During PA Strategies:                         |          |          |
| Snack previous to PA                          | 5/14     | 7/14     |
| Bolus reduction for food previous to PA       | 6/14     | 5/14     |
| Snack during PA                               | 3/14     | 6/14     |
| Basal insulin reduction previous to PA        | 5/14     | 7/14     |
| Basal insulin reduction during PA             | 5/14     | 7/14     |
| Post PA Strategies:                           |          |          |
| Basal insulin reduction posterior to PA       | 3/14     | 2/14     |
| Basal insulin reduction night posterior to PA | 2/14     | 3/14     |
| Snack posterior to PA                         | 1/14     | 3/14     |
| Bolus reduction for food posterior to PA      | 0/14     | 0/14     |
| Correction bolus posterior to PA              | 4/14     | 5/14     |
| DMES score                                    | 2 ± 2.2  | 3 ± 2.2  |

Values are the percentage of subjects' diabetes management strategies reported by each group.  
No statistical differences were found between groups.

**Supplementary Table 3:** Diabetes management strategies for exercise reported by group (n=14 per group)

| Diabetes management strategies                | LL Group | HL Group |
|-----------------------------------------------|----------|----------|
| PA Hours Strategies:                          |          |          |
| Snack previous to PA                          | 5/14     | 7/14     |
| Bolus reduction for food previous to PA       | 6/14     | 5/14     |
| Snack during PA                               | 3/14     | 6/14     |
| Basal insulin reduction previous to PA        | 5/14     | 7/14     |
| Basal insulin reduction during PA             | 5/14     | 7/14     |
| SB Hours Strategies:                          |          |          |
| Basal insulin reduction posterior to PA       | 3/14     | 2/14     |
| Basal insulin reduction night posterior to PA | 2/14     | 3/14     |
| Snack posterior to PA                         | 1/14     | 3/14     |
| Bolus reduction for food posterior to PA      | 0/14     | 0/14     |
| Correction bolus posterior to PA              | 4/14     | 5/14     |
| DMES score                                    | 2 ± 2.2  | 3 ± 2.2  |

*Values are the percentage of subjects' diabetes management strategies reported by each group.  
No statistical differences were found between groups.*
